# Supplementary material for: P3-Type K0.45Co1/12Mg1/12Mn5/6O2 as a superior cathode material for potassium-ion batteries with high structural reversibility ensured by Co–Mg Co-substitution
Source: Royal Society of Chemistry journal article supplement (doi:10.1039/d1ta05579h), 2021-01-01
Supplement: d1ta05579h1.pdf [file d1ta05579h1.pdf]

# Supporting Information

## P3-Type $\text{K}_{0.45}\text{Co}_{1/12}\text{Mg}_{1/12}\text{Mn}_{5/6}\text{O}_2$ as a Superior Cathode Material for Potassium-Ion Batteries with High Structural Reversibility Ensured by the Co–Mg Co-Substitution

*Jinji Liang, Chenhan Lin, Xiangcong Meng, Min Liang, Jie Lai, Xuhong Zheng,*

*Quanzhuang Huang, Liying Liu\* and Zhicong Shi\**

School of Materials and Energy, Guangzhou Key Laboratory of Low-dimensional

Materials and Energy Storage Devices, Guangdong University of Technology,

Guangzhou, 510006, China

\*Corresponding author: [liyingliusy@gdut.edu.cn](mailto:liyingliusy@gdut.edu.cn) (Liying Liu); [zhicong@gdut.edu.cn](mailto:zhicong@gdut.edu.cn) (Zhicong Shi)

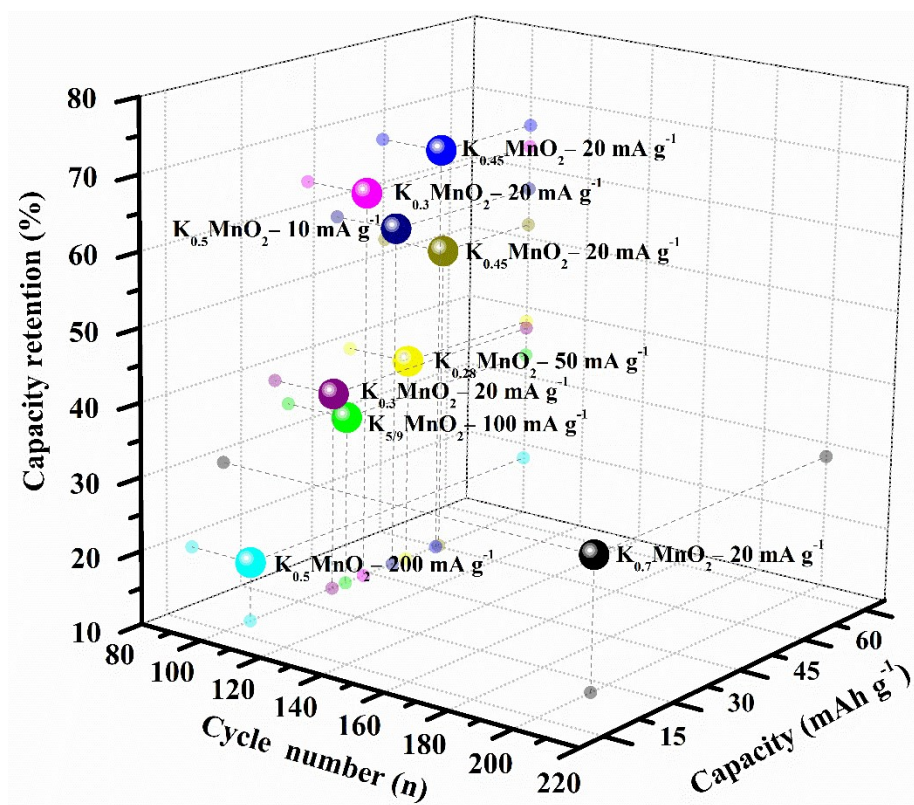

**Figure S1.** Electrochemical performance of the  $K_xMnO_2$  in PIBs.<sup>1-9</sup>

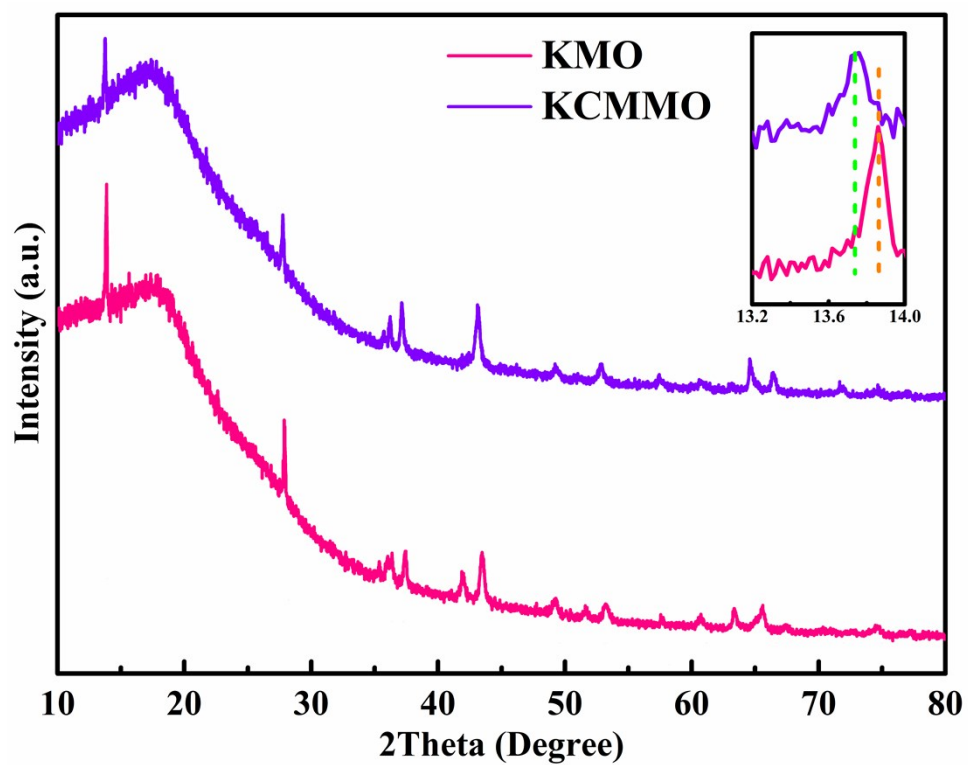

**Figure S2.** XRD patterns of  $K_{0.45}Co_{1/12}Mg_{1/12}Mn_{5/6}O_2$  (KCMMO) and  $K_{0.45}MnO_2$  (KMO) collected by sealing the samples with a Polyimide film.

**Table S1.** The refined crystal sites and atom occupancies from Rietveld refinement results for $K_{0.45}Co_{1/12}Mg_{1/12}Mn_{5/6}O_2$  tested at 25 °C.

| Atom                 | x       | y       | z       | Occ.                   |
|----------------------|---------|---------|---------|------------------------|
| K                    | 0.723   | 0       | 0.522   | 0.45                   |
| Co                   | 0       | 0       | 0       | 0.083                  |
| Mg                   | 0       | 0       | 0       | 0.083                  |
| Mn                   | 0       | 0       | 0       | 0.833                  |
| O1                   | 0.365   | 0       | 0.136   | 0.232                  |
| O2                   | 0.723   | 0       | 0.522   | 0.902                  |
| O3                   | 0       | 0       | 0.5     | 0.864                  |
| Monoclinic C2/m (12) | a=5.068 | b=2.872 | c=7.180 | V=102.0 Å <sup>3</sup> |
|                      | R=9.88% | E=3.31% | P=43    | EPS=0.5                |

**Table S2.** The refined crystal sites and atom occupancies from Rietveld refinement results for $K_{0.45}Co_{1/12}Mg_{1/12}Mn_{5/6}O_2$  tested at 300 °C.

| Atom                | x       | y       | z        | Occ.                   |
|---------------------|---------|---------|----------|------------------------|
| K                   | 0       | 0       | 0.836    | 0.45                   |
| Co                  | 0       | 0       | 0        | 0.083                  |
| Mg                  | 0       | 0       | 0        | 0.083                  |
| Mn                  | 0       | 0       | 0        | 0.833                  |
| O1                  | 0       | 0       | 0.382    | 1                      |
| O2                  | 0       | 0       | 0.618    | 1                      |
| Hexagonal R3m (160) | a=2.893 | b=2.893 | c=19.338 | V=140.2 Å <sup>3</sup> |
|                     | R=5.86% | E=3.31% | P=25     | EPS=0.5                |

**Table S3.** The refined crystal sites and atom occupancies from Rietveld refinement results for

$K_{0.45}MnO_2$  tested at 25 °C.

| Atom                 | x        | y       | z       | Occ.                   |
|----------------------|----------|---------|---------|------------------------|
| K                    | 0.723    | 0       | 0.522   | 0.45                   |
| Mn                   | 0        | 0       | 0.136   | 1                      |
| O1                   | 0.365    | 0       | 0.382   | 0.232                  |
| O2                   | 0.723    | 0       | 0.522   | 0.902                  |
| O3                   | 0        | 0       | 0.5     | 0.864                  |
| Monoclinic C2/m (12) | a=5.167  | b=2.843 | c=7.119 | V=101.9 Å <sup>3</sup> |
|                      | R=17.14% | E=2.78% | P=56    | EPS=0.5                |

**Table S4.** The refined crystal sites and atom occupancies from Rietveld refinement results for

$K_{0.45}MnO_2$  tested at 300 °C.

| Atom                | x       | y       | z        | Occ.                   |
|---------------------|---------|---------|----------|------------------------|
| K                   | 0       | 0       | 0.836    | 0.45                   |
| Mn                  | 0       | 0       | 0        | 1                      |
| O1                  | 0       | 0       | 0.382    | 1                      |
| O2                  | 0       | 0       | 0.618    | 1                      |
| Hexagonal R3m (160) | a=2.918 | b=2.918 | c=19.394 | V=143.1 Å <sup>3</sup> |
|                     | R=5.33% | E=2.30% | P=26     | EPS=0.5                |

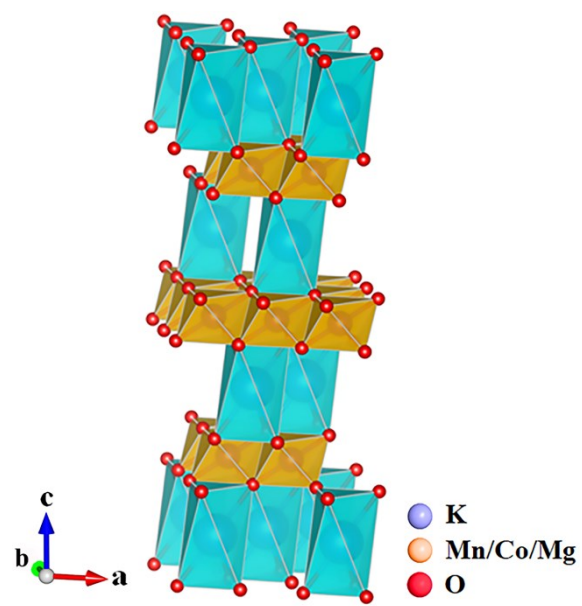

**Figure S3.** Schematic crystal structure of P3 type.



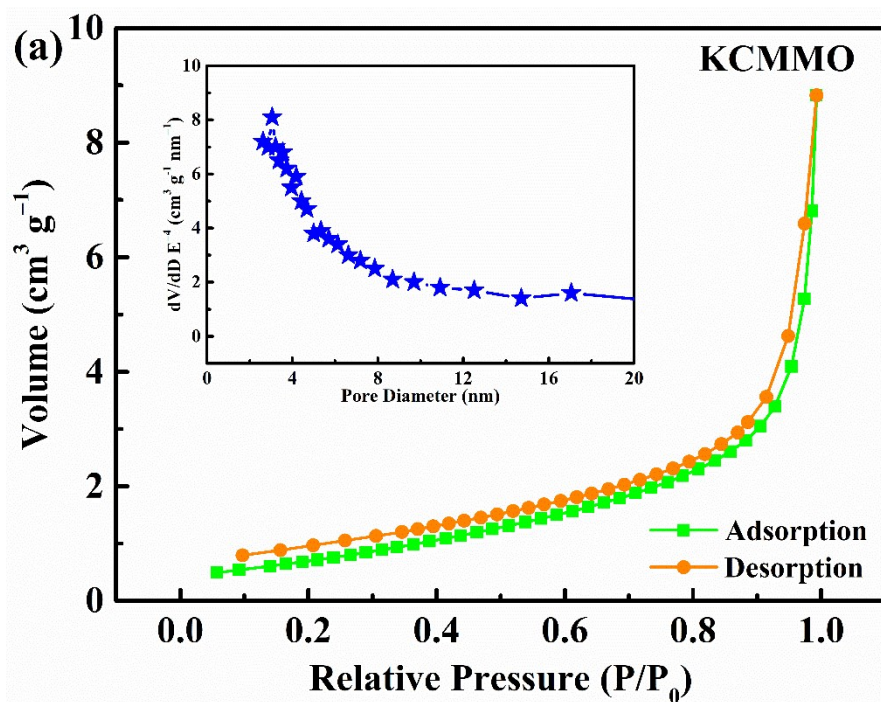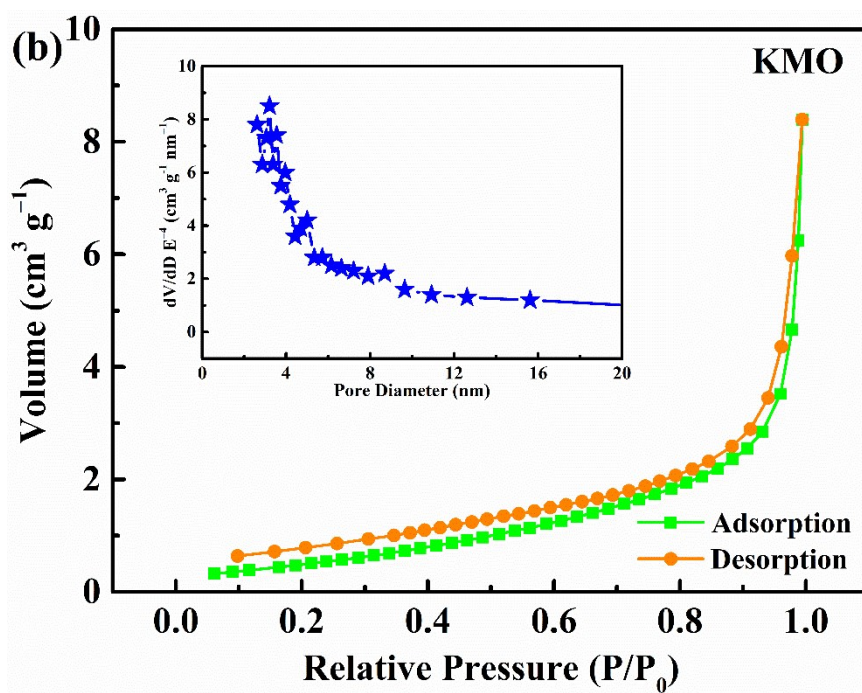

**Figure. S4** Nitrogen adsorption-desorption isotherms and pore size distribution for KCMMO (a) and KMO (b) samples.

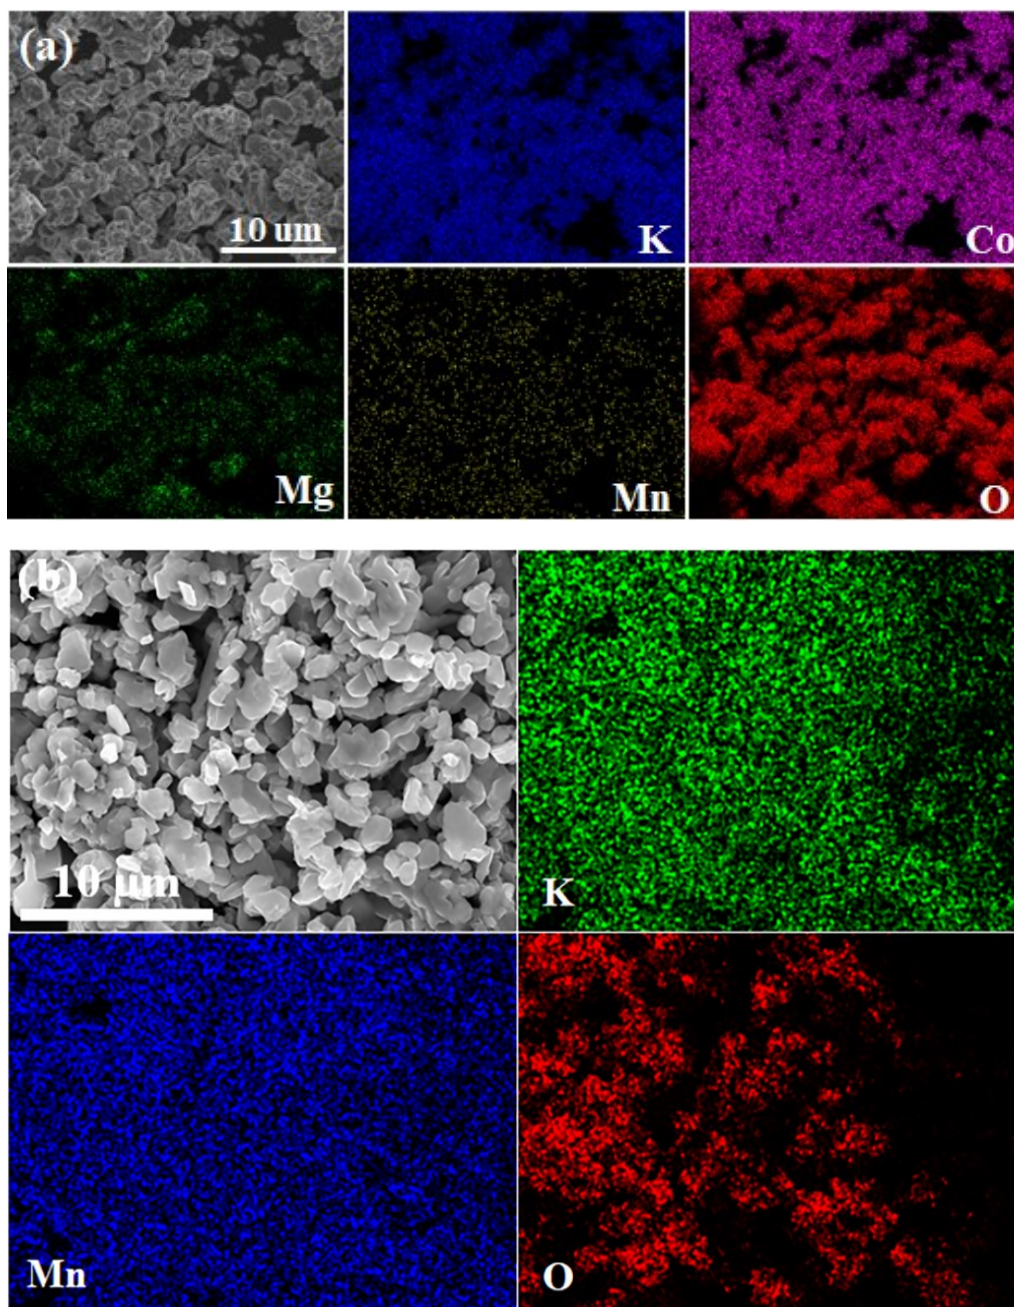

Figure S5. SEM images and EDS mappings of (a) KCMMO and (b) KMO.

**Table S5.** Theoretical/tested ICP element contents (at %).

| Samples | K         | Mn          | Co          | Mg          |
|---------|-----------|-------------|-------------|-------------|
| KMO     | 0.45/0.42 | 1.00/0.97   | -           | -           |
| KCMMO   | 0.45/0.42 | 0.833/0.834 | 0.083/0.082 | 0.083/0.081 |

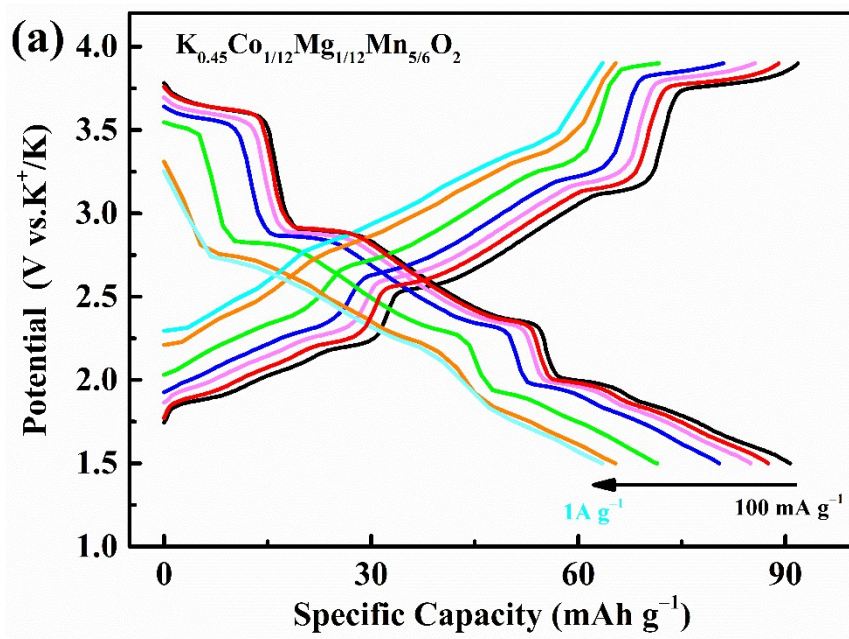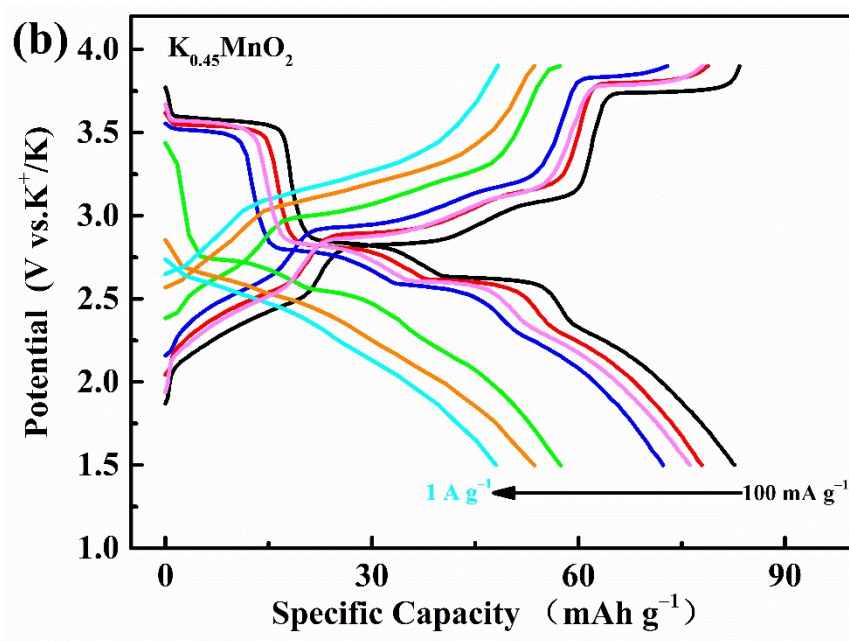

**Figure S6.** Voltage profiles at different rates for (a) KCMMO and (b) KMO in the voltage range

of

1.5–3.9

V.

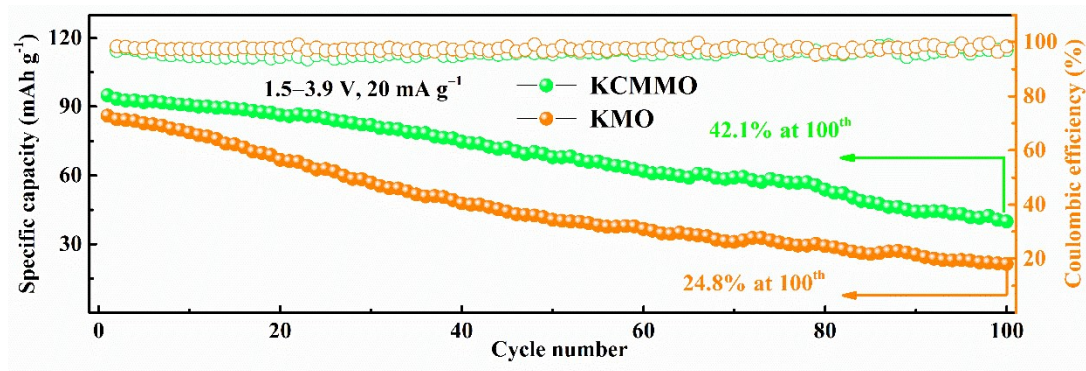

**Figure S7.** Cycle performances for KCMMO and KMO at 20 mA g<sup>-1</sup>.

**Table S6.** Comparison of the 1<sup>st</sup> discharge capacity of Mn-based oxide cathode materials for PIBs

| Sample                                                                                                      | Initial discharge specific capacity / mAh g <sup>-1</sup> | Voltage range / V | Current density / mA g <sup>-1</sup> | References       |
|-------------------------------------------------------------------------------------------------------------|-----------------------------------------------------------|-------------------|--------------------------------------|------------------|
| KCMMO                                                                                                       | 96.5                                                      | 1.5–3.9           | 20                                   | <b>This work</b> |
| K <sub>5/9</sub> Mn <sub>5/9</sub> Ti <sub>4/9</sub> O <sub>2</sub>                                         | 85.6                                                      | 1.5–4.2           | 20                                   | 2                |
| K <sub>0.45</sub> Ni <sub>0.1</sub> Co <sub>0.1</sub> Mn <sub>0.8</sub> O <sub>2</sub>                      | 89.2                                                      | 1.5–4.0           | 20                                   | 10               |
| K <sub>0.45</sub> Ni <sub>0.1</sub> Co <sub>0.1</sub> Mg <sub>0.05</sub> Mn <sub>0.75</sub> O <sub>2</sub>  | 80.8                                                      | 1.5–4.0           | 20                                   | 10               |
| K <sub>0.45</sub> Ni <sub>0.1</sub> Co <sub>0.1</sub> Al <sub>0.05</sub> Mn <sub>0.75</sub> O <sub>2</sub>  | 84.5                                                      | 1.5–4.0           | 20                                   | 10               |
| K <sub>0.67</sub> Ni <sub>0.17</sub> Co <sub>0.17</sub> Mn <sub>0.66</sub> O <sub>2</sub>                   | 76.5                                                      | 2.0–4.3 V         | 20                                   | 11               |
| K <sub>0.4</sub> Mn <sub>0.7</sub> Ni <sub>0.3</sub> O <sub>2</sub>                                         | 93.7                                                      | 2.0–3.9 V         | 100                                  | 12               |
| K <sub>0.48</sub> Ni <sub>0.2</sub> Co <sub>0.2</sub> Mn <sub>0.6</sub> O <sub>2</sub>                      | 57                                                        | 1.5–4.2 V         | 40                                   | 13               |
| K <sub>0.48</sub> Mn <sub>0.4</sub> Co <sub>0.6</sub> O <sub>2</sub>                                        | 65                                                        | 1.0–4.2 V         | 10                                   | 14               |
| K <sub>0.37</sub> Na <sub>0.3</sub> Ni <sub>0.17</sub> Co <sub>0.17</sub> Mn <sub>0.66</sub> O <sub>2</sub> | 86.1                                                      | 2.0–4.2           | 20                                   | 15               |
| K <sub>0.5</sub> MnO <sub>2</sub>                                                                           | 106                                                       | 1.5–3.9           | 5                                    | 16               |
| K <sub>0.5</sub> Mn <sub>0.72</sub> Ni <sub>0.15</sub> Co <sub>0.13</sub> O <sub>2</sub>                    | 82.9                                                      | 1.5–4.0           | 10                                   | 17               |
| K <sub>0.5</sub> [Mn <sub>0.85</sub> Ni <sub>0.1</sub> Co <sub>0.05</sub> ]O <sub>2</sub>                   | 96                                                        | 1.5–3.9           | 20                                   | 18               |

**Table S7.** Comparison of  $K^+$  Diffusion Coefficients ( $D_{K^+}$ ) obtained by GITT of Mn-based oxide cathode materials for PIBs.

| Sample                                                                             | $D_{K^+} / \text{cm}^2 \text{s}^{-1}$ | References       |
|------------------------------------------------------------------------------------|---------------------------------------|------------------|
| KCMMO                                                                              | $10^{-10}$ to $10^{-8}$               | <b>This work</b> |
| $K_{0.7}\text{MnO}_2$                                                              | $10^{-14}$ to $10^{-10}$              | 1                |
| $K_{0.7}\text{Mn}_{0.7}\text{Mg}_{0.3}\text{O}_2$                                  | $10^{-12}$ to $10^{-10}$              | 1                |
| $K_{0.5}\text{MnO}_2$                                                              | $10^{-14}$ to $10^{-13}$              | 4                |
| $K_{0.28}\text{MnO}_2 \cdot 0.15\text{H}_2\text{O}$                                | $10^{-12}$ to $10^{-8}$               | 6                |
| $K_{0.28}\text{MnO}_2$                                                             | $10^{-13}$ to $10^{-9}$               | 6                |
| $K_{0.45}\text{Ni}_{0.1}\text{Co}_{0.1}\text{Mg}_{0.05}\text{Mn}_{0.75}\text{O}_2$ | $10^{-14}$ to $10^{-13}$              | 10               |
| $K_{0.64}\text{Na}_{0.04}[\text{Ni}_{1/3}\text{Mn}_{2/3}]\text{O}_2$               | $10^{-12}$ to $10^{-10}$              | 19               |

## REFERENCES

- 1 J. Weng, J. Duan, C. Sun, P. Liu, A. Li, P. Zhou and J. Zhou, *Chem. Eng. J.*, 2020, **392**, 123649.
- 2 Y. Xu, Q. Zhang, D. Wang, J. Gao, X. Tao, Y. Liu, Y. Sun, L. Gu, B. Chang, C. Liu, S. Shi and A. Cao, *Energy Storage Materials*, 2020, **31**, 20–26.
- 3 C. Liu, S. Luo, H. Huang, X. Liu, Y. Zhai and Z. Wang, *Chem. Eng. J.*, 2019, **378**, 122167.
- 4 B. Peng, Y. Li, J. Gao, F. Zhang, J. Li and G. Zhang, *J. Power Sources*, 2019, **437**, 226913.
- 5 C. Liu, S. Luo, H. Huang, Y. Zhai and Z. Wang, *Chem. Eng. J.*, 2019, **356**, 53–59.
- 6 J. H. Jo, J. Y. Hwang, J. Choi, Y. K. Sun and S. T. Myung, *ACS Appl. Mater. Interfaces*, 2019, **11**, 43312–43319.
- 7 C. I. Liu, S. h. Luo, H. b. Huang, Y. c. Zhai and Z. w. Wang, *ChemElectroChem*, 2019, **6**, 2308–2315.
- 8 M. K. Cho, J. H. Jo, J. U. Choi and S. T. Myung, *ACS Appl. Mater. Interfaces*, 2019, **11**, 27770–27779.
- 9 Q. Zhang, C. Didier, W. K. Pang, Y. Liu, Z. Wang, S. Li, V. K. Peterson, J. Mao and Z. Guo, *Adv. Energy Mater.*, 2019, **9**, 1900568.
- 10 R. Dang, N. Li, Y. Yang, K. Wu, Q. Li, Y. L. Lee, X. Liu, Z. Hu and X. Xiao, *J. Power Sources*, 2020, **464**, 228190.
- 11 C. Liu, S. Luo, H. Huang, Z. Wang, A. Hao, Y. Zhai and Z. Wang, *Electrochem. Commun.*, 2017, **82**, 150–154.
- 12 Z. Xiao, J. Meng, F.-J. Xia, J. Wu, F. Liu, X. Zhang, L.-H. Xu, X. Lin and L. Mai, *Energy Environ. Sci.*, 2020, **13**, 3129–3137.
- 13 S. Xu, C. Bao, M. Yu, S. Liu, L. Chen, and D. Zhang, *Mater. Lett.*, 2020, **270**, 127733.



- 14 K. Sada and P. Barpanda, *Chem. Commun.*, 2020, **56**, 2272–2275.
- 15 C. Liu, S. Luo, H. Huang, Y. Zhai and Z. Wang, *Electrochim. Acta*, 2018, **286**, 114–122.
- 16 H. Kim, D. H. Seo, J. C. Kim, S. H. Bo, L. Liu, T. Shi and G. Ceder, *Adv. Mater.*, 2017, **29**, 1702480.
- 17 Q. Deng, F. Zheng, W. Zhong, Q. Pan, Y. Liu, Y. Li, G. Chen, Y. Li, C. Yang and M. Liu, *Chem. Eng. J.*, 2020, **392**, 123735.
- 18 J. Hao, K. Xiong, J. Zhou, A. M. Rao, X. Wang, H. Liu and B. Lu, *Energy Environ. Mater.*, 2021, **0**, 1–9.
- 19 M. G. T. Nathan, N. Naveen, W. B. Park, K.-S. Sohn and M. Pyo, *J. Power Sources*, 2019, **438**, 226992.
